# Supplementary material for: Red-Emitting Carbon Quantum Dots for Biomedical Applications: Synthesis and Purification Issues of the Hydrothermal Approach
Source: MDPI journal article supplement (doi:10.3390/nano13101635), 2023-05-13
Supplement: s1 [file s1]

# Red-Emitting Carbon Quantum Dots for Biomedical Applications: Synthesis and Purification Issues of the Hydrothermal Approach

Barbara La Ferla <sup>1</sup> and Barbara Vercelli <sup>2,\*</sup>

<sup>1</sup> Dipartimento di Biotecnologie e di Bioscienze, Università degli Studi di Milano-Bicocca, Piazza della Scienza, 2, 20126 Milano, Italy; barbara.laferla@unimib.it

<sup>2</sup> Istituto di Chimica della Materia Condensata e di Tecnologie per l'Energia, CNR-ICMATE, Via Cozzi, 53, 20125 Milano, Italy

\* Correspondence: barbara.vercelli@cnr.it

## **Contents**

|                                         |                 |
|-----------------------------------------|-----------------|
| <b>Quantum Yields (QY) measurements</b> | <b>page S02</b> |
| <b>Figure S1</b>                        | <b>page S03</b> |
| <b>Figure S2</b>                        | <b>page S04</b> |
| <b>Figure S3</b>                        | <b>page S05</b> |

## Quantum Yields (QY) measurements

QY of the r-CDs was determined by a relative method [32–34]. Rhodamine B (QY = 56% in EtOH) was selected as reference dye for the emission range 580-610 nm.

The QY was calculated according to the following equation:

$$\varphi = \varphi' \times \frac{A'}{I'} \times \frac{I}{A} \times \frac{n^2}{n'^2}$$

where  $\varphi$  is the QY of the testing sample,  $I$  is the testing sample's integrated emission intensity,  $n$  is the refractive index (1.33 for water and 1.36 for EtOH), and  $A$  is the optical density. The superscript “'” refers to the referenced fluorescence dyes of known QYs. To obtain reliable results, a series of solutions of r-CDs and Rhodamine B were prepared with concentrations adjusted such that the optical absorbance values were between 0-0.1 at 510 nm. The PL spectra were measured, and the PL intensity was integrated. The QYs were determined by comparison of the integrated PL intensity vs absorbance curves (refractive index,  $n$ , had also be considered).

### r-CDs $\lambda = 510$ nm (EtOH)

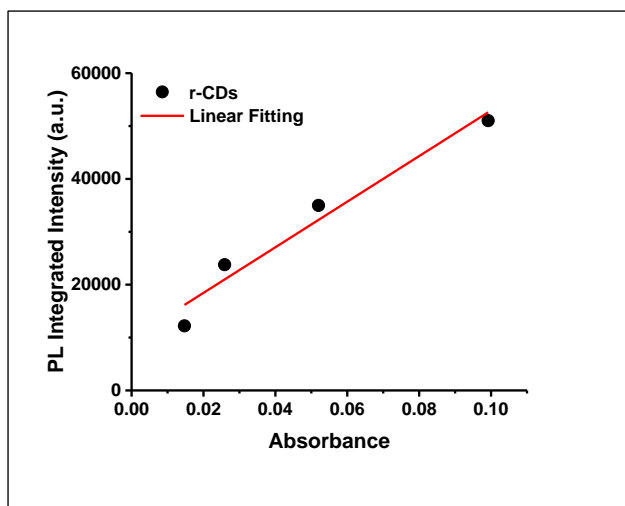

### Rhodamine B $\lambda = 510$ nm (EtOH)

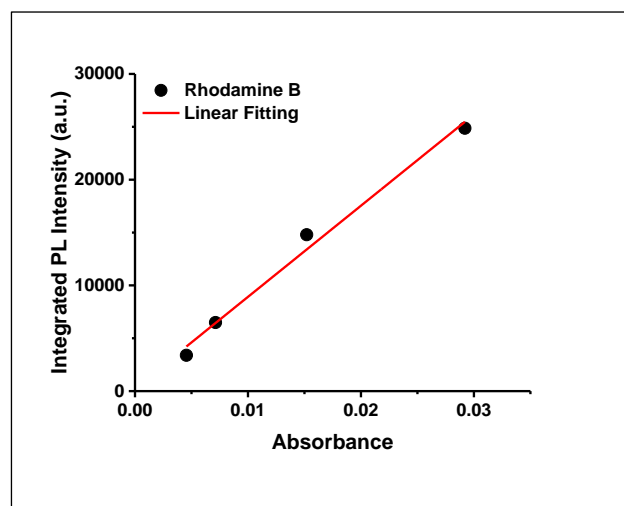

|               | r-CDs             |       |       |       | Rhodamine B       |        |        |       |
|---------------|-------------------|-------|-------|-------|-------------------|--------|--------|-------|
| Abs           | 0.015             | 0.026 | 0.052 | 0.099 | 0.0046            | 0.0071 | 0.0152 | 0.029 |
| Integrated PL | 12219             | 23775 | 34984 | 51014 | 3391              | 6487   | 14788  | 24861 |
| Slope         | $4.3 \times 10^6$ |       |       |       | $8.6 \times 10^6$ |        |        |       |
| QY            | 27%               |       |       |       | 56%               |        |        |       |

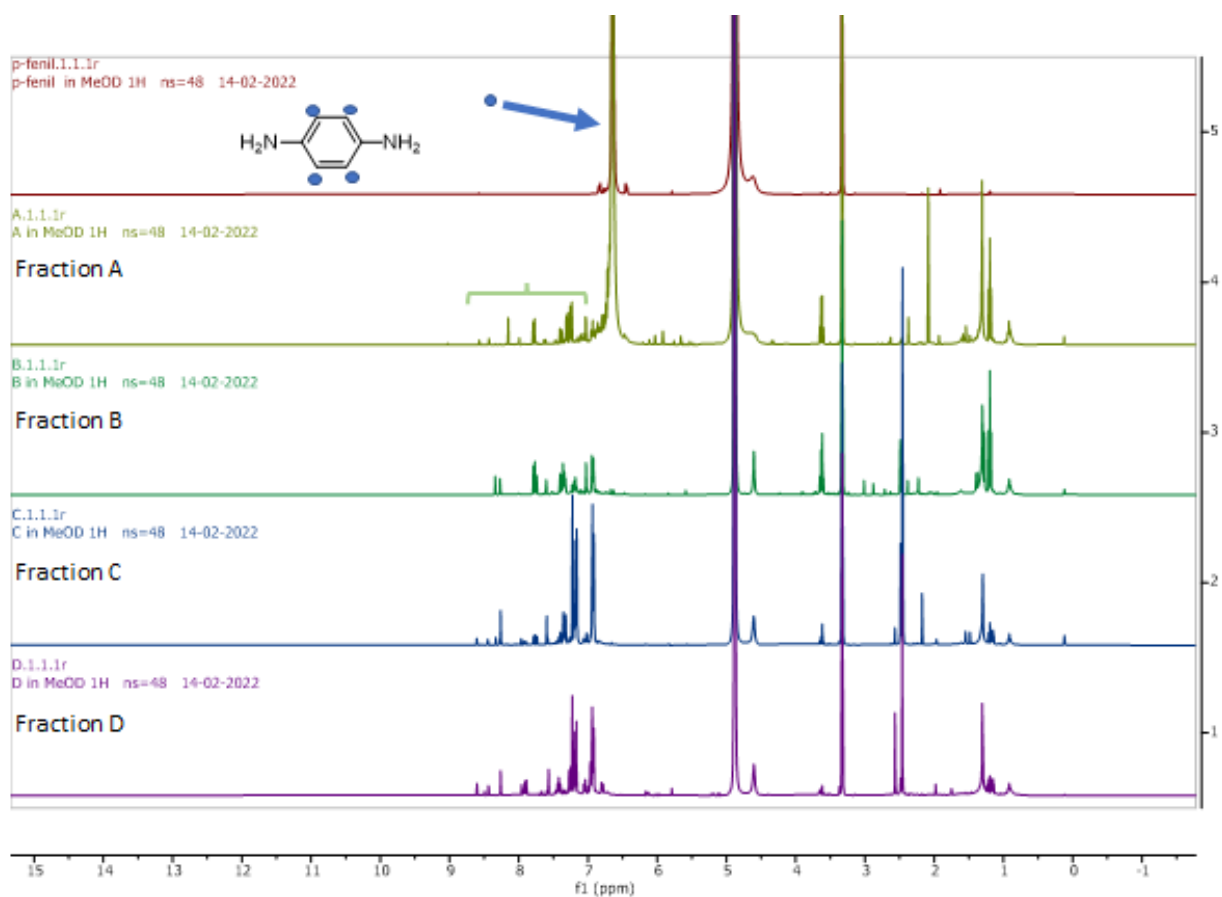

**Figure S1**  $^1\text{H}$ -NMR spectra of p-PDA and fractions A, B, C and D performed in MeOD.

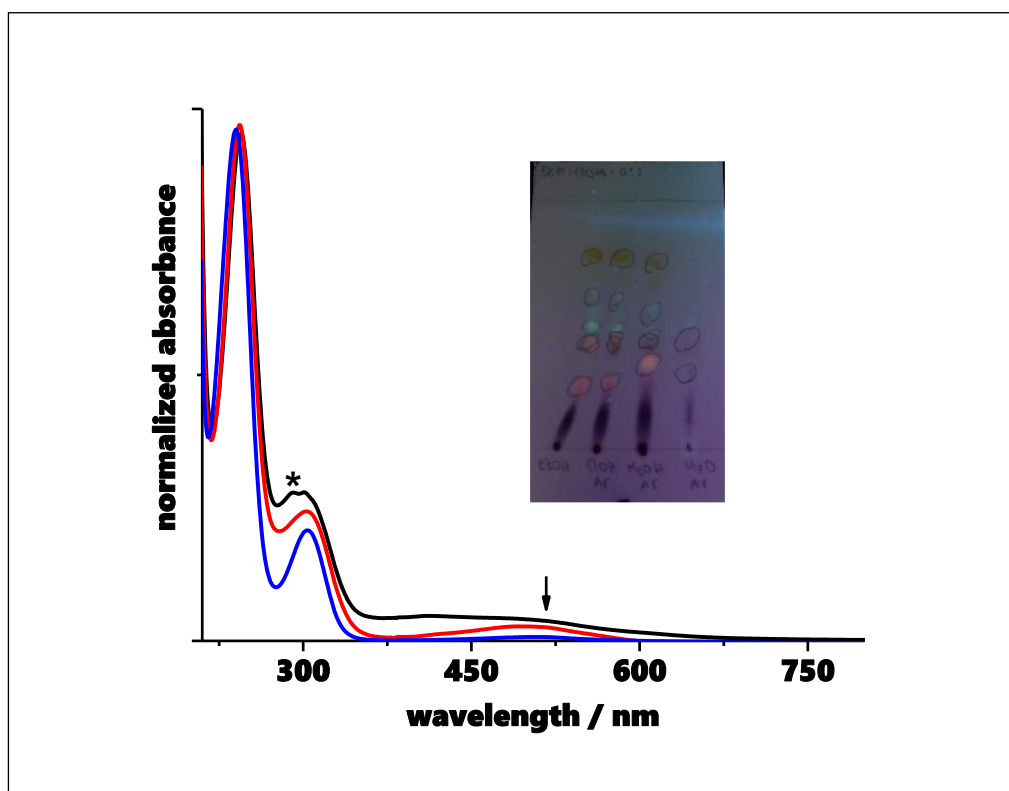

**Figure S2** – UV-vis of CDs reaction mixtures obtained employing EtOH (black line), MeOH (red line) and water (blue line), respectively as solvents. Inset: TLC of the reaction mixtures obtained with the different solvents. Eluent: dichloromethane/EtOH 9:1. From left to right: EtOH, MeOH and water.

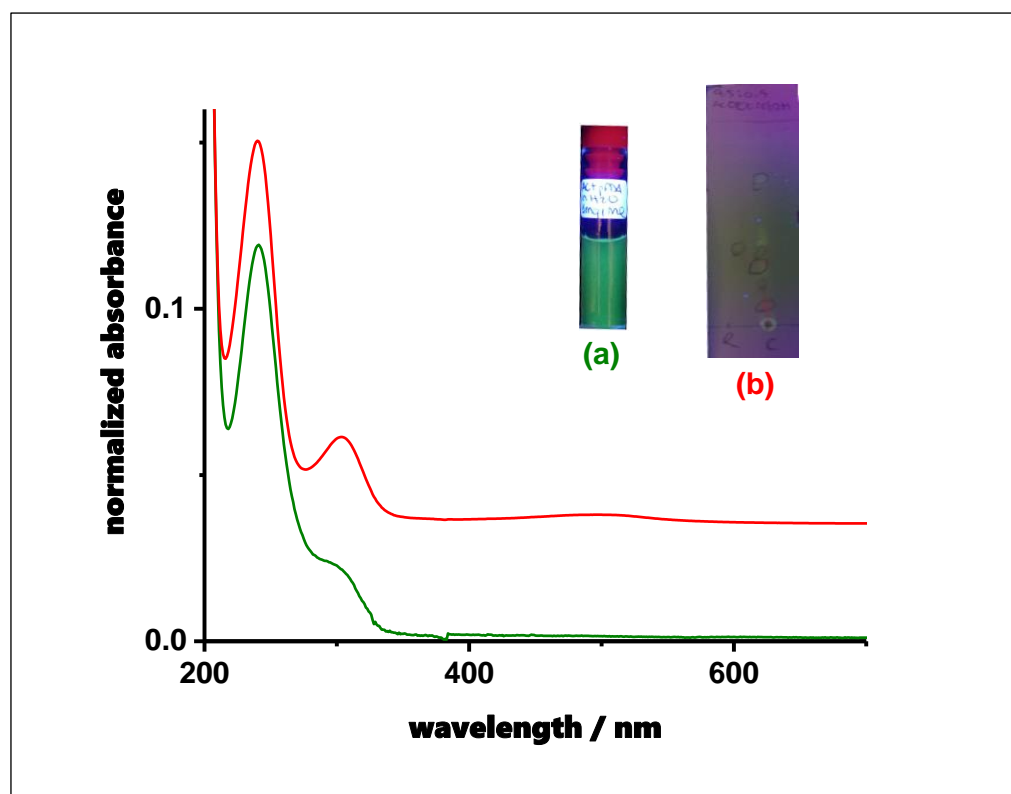

**Figure S3** – UV-vis of CDs reaction mixtures in water obtained employing CA (green line) and urea (red line), respectively, as co-precursors. Inset: (a) Photograph of the reaction mixture in water obtained employing CA under 356 nm UV lamp; (b) TLC of the reaction mixture obtained with urea. Eluent: AcOEt/EtOH 9.5:0.5. From left to right: p-DPA and reaction mixture.
